# Supplementary material for: Significantly improved thermoelectric performance of SnSe originating from collaborative adjustment between valence and conduction bands, mass fluctuations, and local strain
Source: Royal Society of Chemistry journal article supplement (doi:10.1039/d3cp02330c), 2023-01-01
Supplement: d3cp02330c1.pdf [file d3cp02330c1.pdf]

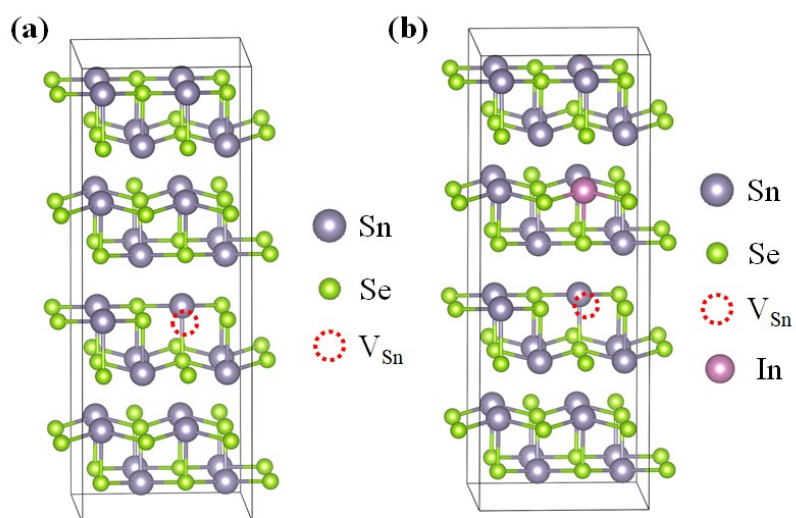

SFig1 crystal structure model of  $\text{Sn}_{31}\text{Se}_{32}$  (a) and  $\text{Sn}_{30}\text{InSe}_{32}$  (b)

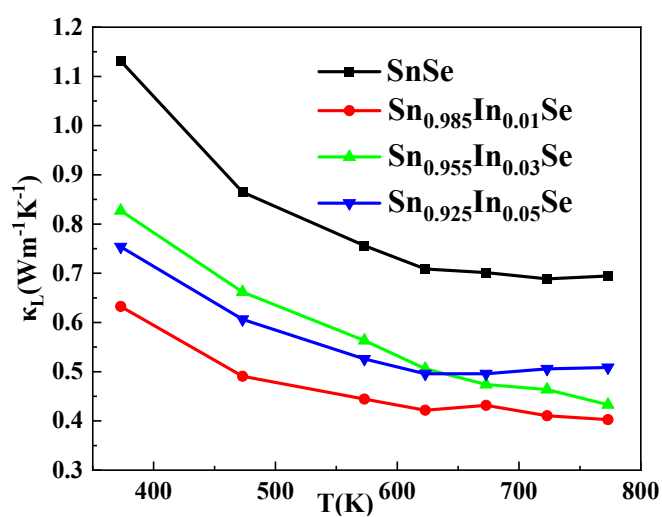

SFig2 Temperature dependency of lattice thermal conductivity for  $\text{Sn}_{1-3x/2}\text{In}_x\text{Se}$  ( $x = 0.0, 0.01, 0.03, 0.05$ ) samples.
